# Supplementary material for: Quality of life of transgender people under the lens of social determinants of health: a scoping review protocol
Source: HighWire-hosted journal article supplement (doi:10.1136/bmjopen-2022-067575), 2023-07-01
Supplement: bmjopen-2022-067575supp001_data_supplement.pdf [file bmjopen-2022-067575supp001_data_supplement.pdf]

**Supplementary File 1.** Preliminary pilot search strategy in all databases.

| Databases        | Item searched                                                                                                                                                                                                                                                                                                                                                                                                                                                                                                                                                                                                                                                                                                                                                                                                                                                                                                                                                                                                                                                                                                                                                                                                                                                                                                                                                                                                                                                                                              |
|------------------|------------------------------------------------------------------------------------------------------------------------------------------------------------------------------------------------------------------------------------------------------------------------------------------------------------------------------------------------------------------------------------------------------------------------------------------------------------------------------------------------------------------------------------------------------------------------------------------------------------------------------------------------------------------------------------------------------------------------------------------------------------------------------------------------------------------------------------------------------------------------------------------------------------------------------------------------------------------------------------------------------------------------------------------------------------------------------------------------------------------------------------------------------------------------------------------------------------------------------------------------------------------------------------------------------------------------------------------------------------------------------------------------------------------------------------------------------------------------------------------------------------|
| MEDLINE/PubMed   | <p><b>P- POPULATION</b><br/> <b>#1</b> (("Transgender Persons" [MeSH Terms] OR "Person, Transgender" [All Fields] OR "Persons, Transgender" [All Fields] OR "Transgender Person" [All Fields] OR "Transgenders" [All Fields] OR "Transgender" [All Fields] OR "Transgendered Persons" [All Fields] OR "Transgendered Person" [All Fields] OR "Transsexual Persons" [All Fields] OR "Persons, Transsexual" [All Fields] OR "Transsexual Person" [All Fields] OR "Transexual" [All Fields] OR "Transmen" [All Fields] OR "Transwomen" [All Fields] OR "Non-binary Gender" [All Fields] OR "Genderqueer" [All Fields] OR "Gender Identity" [MeSH Terms] OR "Gender Identities" [All Fields] OR "Identity, Gender" [All Fields] OR "Gender Dysphoria" [MeSH Terms] OR "Gender Identity Disorder" [All Fields] OR "Gender Identity Disorders" [All Fields] OR "Identity Disorder, Gender" [All Fields] OR "Assigned Male at Birth"[All Fields] OR "Assigned Female at Birth"[All Fields]))</p> <p><b>#C: CONCEPT</b><br/> <b>#2</b> ("Quality of Life" [MeSH Terms] OR "Life Quality" [All Fields] OR "Health-Related Quality Of Life" [All Fields] OR "Health Related Quality Of Life" [All Fields] OR "HRQOL" [All Fields])</p> <p><b>#C: CONTEXT</b><br/> <b>#3</b> ("Social Determinants of Health" [MeSH Terms] OR "Health Social Determinants" [All Fields] OR "Structural Determinants of Health" [All Fields] OR "Health Structural Determinants" [All Fields]))</p> <p><b>#4</b> #1 AND (#2 OR #3)</p> |
| Cochrane Library | <p><b>P- POPULATION</b><br/> <b>#1</b> (Transgender Persons) OR (Person, Transgender) OR (Persons, Transgender) OR (Transgender Person) OR (Transgenders) OR (Transgender) OR (Transgendered Persons) OR (Transgendered Person) OR (Transsexual Person) OR (Persons, Transsexual) OR (Transsexual Person) OR (Transexual) OR (Transmen) OR (Transwomen) OR (Non-binary Gender) OR (Genderqueer) OR (Gender Identity) OR (Gender Identities) OR (Identity, Gender) OR (Gender Dysphoria) OR (Gender Identity Disorder) OR (Gender Identity Disorders) OR (Identity Disorder, Gender) OR (Assigned Male at Birth) OR (Assigned Female at Birth)</p> <p><b>#C: CONCEPT</b><br/> <b>#2</b> (Quality of Life) OR (Life Quality) OR (Health-Related Quality Of Life) OR (Health Related Quality Of Life) OR (HRQOL)</p> <p><b>#C: CONTEXT</b><br/> <b>#3</b> (Social Determinants of Health) OR (Health Social Determinants) OR (Structural Determinants of Health) OR (Health Structural Determinants)</p> <p><b>#4</b> #1 AND (#2 OR #3)</p>                                                                                                                                                                                                                                                                                                                                                                                                                                                                   |
| Embase           | <p><b>P- POPULATION</b><br/> <b>#1</b> ('transgender'/exp OR 'trans people' OR 'trans person' OR 'transgender' OR 'transgender person' OR 'transgender persons' OR 'transgendered people' OR 'transgendered person' OR 'transgendered persons' OR 'transgenders' OR 'transpeople' OR 'transperson' OR 'transsexual' OR 'transsexuals' OR 'female to male transgender'/exp OR 'ftm transgender' OR 'ftm transsexual' OR 'ftm transsexuals' OR 'female to male transgender' OR 'female to male transgenders' OR 'female to male transsexual' OR 'female to male transsexuals' OR 'trans man' OR 'transman' OR 'transmen' OR 'male to female transgender'/exp OR 'mtf transgender' OR 'mtf transsexual' OR 'mtf transsexuals' OR 'male to female transgender' OR 'male to</p>                                                                                                                                                                                                                                                                                                                                                                                                                                                                                                                                                                                                                                                                                                                                 |

|                |                                                                                                                                                                                                                                                                                                                                                                                                                                                                                                                                                                                                                                                                                                                                                                                                                                                                                                                                                                                        |
|----------------|----------------------------------------------------------------------------------------------------------------------------------------------------------------------------------------------------------------------------------------------------------------------------------------------------------------------------------------------------------------------------------------------------------------------------------------------------------------------------------------------------------------------------------------------------------------------------------------------------------------------------------------------------------------------------------------------------------------------------------------------------------------------------------------------------------------------------------------------------------------------------------------------------------------------------------------------------------------------------------------|
|                | <p>female transsexual' OR 'male to female transsexuals' OR 'trans woman' OR 'transwoman' OR 'transwomen' OR 'gender dysphoria'/exp OR 'dysphoria, gender' OR 'gender dysphoria' OR 'gender identity disorder' OR 'sexual dysphoria' OR 'gender identity'/exp OR 'gender identity' OR 'gender self-identification' OR 'identity, sexual' OR 'sex identification' OR 'sexual identification' OR 'sexual identity' OR 'sexual self-identification' OR 'assigned male at birth' OR 'assigned female at birth'</p> <p><b>#C: CONCEPT</b><br/> <b>#2</b> ('quality of life'/exp OR 'hrql' OR 'health related quality of life' OR 'life quality' OR 'quality of life')</p> <p><b>#C: CONTEXT</b><br/> <b>#3</b> ('social determinants of health'/exp OR 'social determinant' OR 'social determinants' OR 'social determinants of health' OR 'social determining factor' OR 'social factors determining health' OR 'social health determinant')</p> <p><b>#4</b> #1 AND (#2 OR #3)</p>         |
| Web of Science | <p><b>P- POPULATION</b><br/> <b>#1</b> ALL=(Transgender Persons OR Person, Transgender OR Persons, Transgender OR Transgender Person OR Transgenders OR Transgender OR Transgendered Persons OR Transgendered Person OR Transsexual Person OR Persons, Transsexual OR Transsexual Person OR Transexual OR Transmen OR Transwomen OR Non-binary Gender OR Genderqueer OR Gender Identity OR Gender Identities OR Identity, Gender OR Gender Dysphoria OR Gender Identity Disorder OR Gender Identity Disorders OR Identity Disorder, Gender OR Assigned Male at Birth OR Assigned Female at Birth)</p> <p><b>#C: CONCEPT</b><br/> <b>#2</b> ALL=(Quality of Life OR Life Quality OR Health-Related Quality Of Life OR Health Related Quality Of Life OR HRQOL)</p> <p><b>#C: CONTEXT</b><br/> <b>#3</b> ALL=(Social Determinants of Health OR Health Social Determinants OR Structural Determinants of Health OR Health Structural Determinants)</p> <p><b>#4</b> #1 AND (#2 OR #3)</p> |
| Scopus         | <p><b>P- POPULATION</b><br/> <b>#1</b> (Transgender Persons OR Person, Transgender OR Persons, Transgender OR Transgender Person OR Transgenders OR Transgender OR Transgendered Persons OR Transgendered Person OR Transsexual Person OR Persons, Transsexual OR Transsexual Person OR Transexual OR Transmen OR Transwomen OR Non-binary Gender OR Genderqueer OR Gender Identity OR Gender Identities OR Identity, Gender OR Gender Dysphoria OR Gender Identity Disorder OR Gender Identity Disorders OR Identity Disorder, Gender OR Assigned Male at Birth OR Assigned Female at Birth))</p> <p><b>#C: CONCEPT</b><br/> <b>#2</b> (Quality of Life OR Life Quality OR Health-Related Quality Of Life OR Health Related Quality Of Life OR HRQOL)</p> <p><b>#C: CONTEXT</b><br/> <b>#3</b> Social Determinants of Health OR Health Social Determinants OR Structural Determinants of Health OR Health Structural Determinants)</p> <p><b>#4</b> #1 AND (#2 OR #3)</p>             |

|                                                       |                                                                                                                                                                                                                                                                                                                                                                                                                                                                                                                                                                                                                              |
|-------------------------------------------------------|------------------------------------------------------------------------------------------------------------------------------------------------------------------------------------------------------------------------------------------------------------------------------------------------------------------------------------------------------------------------------------------------------------------------------------------------------------------------------------------------------------------------------------------------------------------------------------------------------------------------------|
| PsycINFO                                              | <b>P- POPULATION</b><br><b>#1</b> (Transgender OR Transphobia OR Gender Equality OR Gender Identity OR Sexual Identity (Gender) OR Gender Nonbinary OR Gender Nonconforming OR Gender Diverse OR Gender Expression OR Transsexualism OR Gender Dysphoria OR Gender Identity Disorder OR Assigned Male at Birth OR Assigned Female at Birth))<br><br><b>#C: CONCEPT</b><br><b>#2</b> (Quality of Life OR Health Status OR Health Related Quality Of Life OR Quality Of Life Measures)<br><br><b>#C: CONTEXT</b><br><b>#3</b> (Social Determinants of Health OR Health Social Determinants)<br><br><b>#4</b> #1 AND (#2 OR #3) |
| <b>Registers</b>                                      | <b>Item searched</b>                                                                                                                                                                                                                                                                                                                                                                                                                                                                                                                                                                                                         |
| ClinicalTrial.gov                                     | (Transgender Persons OR Transgender Transsexual Person OR Gender Identity OR Gender Dysphoria) AND (Quality of Life OR Health-Related Quality Of Life OR Social Determinants of Health)                                                                                                                                                                                                                                                                                                                                                                                                                                      |
| WHO International Clinical Trials Registry Platform   | (Transgender Persons OR Transgender Transsexual Person OR Gender Identity OR Gender Dysphoria) AND (Quality of Life OR Health-Related Quality Of Life OR Social Determinants of Health)                                                                                                                                                                                                                                                                                                                                                                                                                                      |
| <b>Organizations and Websites and grey literature</b> | <b>Item searched</b>                                                                                                                                                                                                                                                                                                                                                                                                                                                                                                                                                                                                         |
| The British Library (UK)                              | <b>#1</b> (Transgender Persons OR Transgender Transsexual Person OR Gender Identity OR Gender Dysphoria)<br><b>#2</b> ((Quality of Life OR Health-Related Quality Of Life OR Social Determinants of Health)                                                                                                                                                                                                                                                                                                                                                                                                                  |
| Google Scholar                                        | (Transgender Persons OR Transgender OR Gender Identity OR Gender Dysphoria) AND (Quality of Life OR Social Determinants of Health)                                                                                                                                                                                                                                                                                                                                                                                                                                                                                           |
| The ProQuest Dissertation & Theses Global             | (Transgender Persons OR Transgender OR Transsexual Person OR Gender Identity OR Gender Dysphoria) AND (Quality of Life OR Health-Related Quality Of Life OR Social Determinants of Health)                                                                                                                                                                                                                                                                                                                                                                                                                                   |
| Preprints for Health Sciences [medRxiv]               | (Transgender Persons OR Transgender OR Gender Identity OR Gender Dysphoria) AND (Quality of Life OR Social Determinants of Health)                                                                                                                                                                                                                                                                                                                                                                                                                                                                                           |
